# Supplementary material for: Consensus on potential biomarkers developed for use in clinical tests for schizophrenia
Source: HighWire-hosted journal article supplement (doi:10.1136/gpsych-2021-100685), 2022-02-01
Supplement: gpsych-2021-100685supp001_data_supplement.pdf [file gpsych-2021-100685supp001_data_supplement.pdf]

**Supplementary Table 1: The potential biomarkers for schizophrenia**

| Biomarker                      | Method                                                                       | Tested population                                      | Number of schizophrenias | Number of controls | Note                                                                      | Differentiation diagnosis                                                                             |
|--------------------------------|------------------------------------------------------------------------------|--------------------------------------------------------|--------------------------|--------------------|---------------------------------------------------------------------------|-------------------------------------------------------------------------------------------------------|
| <b>Genetic markers</b>         |                                                                              |                                                        |                          |                    |                                                                           |                                                                                                       |
| deletion at 22q11.2 [1-2]      | The largest genome-wide analysis (GWAS) of CNVs for any psychiatric disorder | Data sets assembled by the                             | 21094                    | 20227              | Previously known as DiGeorge syndrome or velocardiofacial syndrome, OR=67 | Also related to other psychiatric conditions, including bipolar disorder and autism spectrum disorder |
| duplications at 16p11.2 [3, 4] |                                                                              | Schizophrenia                                          |                          |                    | OR=9.4                                                                    |                                                                                                       |
| deletions at 15q11.2 [3, 4]    |                                                                              | a Working Group of the Psychiatric Genomics Consortium |                          |                    | Angelman or Prader-Willi syndrome, OR=1.8                                 |                                                                                                       |

|                                 |                 |                  |      |       |                                                                                                                                                                                                     |                                      |
|---------------------------------|-----------------|------------------|------|-------|-----------------------------------------------------------------------------------------------------------------------------------------------------------------------------------------------------|--------------------------------------|
| 3p21.31, 6q21, 6q27, 7q31.1 [6] | GWAS            | Chinese          | 7699 | 18327 | Novel GWS loci in Chinese people                                                                                                                                                                    | Candidate genes for further research |
| HNF4G [5]                       | Genetic studies | Caucasian        | 127  | 136   | Associated with attention/vigilance                                                                                                                                                                 |                                      |
| NDUFS4 [5]                      |                 | Caucasian        | 127  | 136   | Associated with verbal memory                                                                                                                                                                       |                                      |
| HDAC9 [5]                       |                 | Caucasian        | 127  | 136   | Associated with reasoning/problem solving                                                                                                                                                           |                                      |
| ANK3 [7]                        |                 | Caucasian        | 116  | 359   | Associated with working/verbal memory, attention; and white matter integrity, brain structure, widespread cortical thinning; and regional activation during executive tasks                         |                                      |
| NRGN [7]                        |                 | Caucasian, Asian | 99   | 645   | Associated with episodic memory, working memory; and grey-matter volume, brain volumes; and regional activation during executive tasks pathways involved in brain development, memory and cognition |                                      |

|                  |  |                  |     |                  |                                                                                                            |  |
|------------------|--|------------------|-----|------------------|------------------------------------------------------------------------------------------------------------|--|
| NRG1 [8]         |  | Asian            | 135 | 119              | Associated with cognitive deficits                                                                         |  |
| GRM5 [9]         |  | Australian       | 249 | 261              | Associated with cognitive impairments; and reduction of right hippocampal volume                           |  |
| DTNBP1 [10, 11]  |  | Asian, Caucasian | 360 | 166              | Associated with attention, vigilance, memory and speed of processing                                       |  |
| 5-HT2A [12, 30]  |  | Caucasian        | 53  | 46<br>(siblings) | Associated with sustained attentional impairment                                                           |  |
| D $\beta$ H [13] |  | Chinese          | 200 | 0                | Associated with cognitive deficits                                                                         |  |
| CACNA1C [14]     |  | Caucasian        | 177 | 2448             | Associated with grey-matter volume; and regional activation/functional connectivity during executive tasks |  |
| TCF4 [7, 16]     |  | Caucasian        | 106 | 212              | Associated with grey-matter volume; and pathways involved in brain development, memory and cognition       |  |

|                                        |            |                       |                               |                                        |                                                                                                                                    |  |
|----------------------------------------|------------|-----------------------|-------------------------------|----------------------------------------|------------------------------------------------------------------------------------------------------------------------------------|--|
| ZNF804A [7, 15]                        |            | Caucasian,<br>Chinese | 825                           | 3212                                   | Associated with grey-matter volume, white matter integrity; and regional activation/functional connectivity during executive tasks |  |
| DGKH [7]                               |            | Caucasian             | 81                            | 75                                     | Associated with regional activation during executive tasks                                                                         |  |
| COMT [15]                              |            | Caucasian             | 175                           | 219<br>(siblings<br>) + 55<br>controls | Associated with prefrontal dopamine catabolism                                                                                     |  |
| Hypermethylation of RELN Promoter [17] |            | Caucasian             | 5 (post-mortem brain samples) | 5                                      | Responsible for gene silencing in the frontal lobe of schizophrenic patients                                                       |  |
| Hypermethylation of GAD1 Promoter [17] | Sequencing | Caucasian             | 14                            | 14                                     | Responsible for gene silencing in the prefrontal cortex of schizophrenic patients                                                  |  |

|                                                |  |           |                                            |     |                                                    |                                                                                                                                         |
|------------------------------------------------|--|-----------|--------------------------------------------|-----|----------------------------------------------------|-----------------------------------------------------------------------------------------------------------------------------------------|
| Hypermethylation of HTR1A Promoter [17]        |  | Caucasian | 40 (blood samples)                         | 67  | Responsible for gene silencing of 5HTR1A gene      | Both schizophrenia and bipolar disorder were similarly affected, indicating the partial overlap model of these two psychotic disorders. |
| DNA methylation of C17orf63, THAP1, KCNQ4 [18] |  | Chinese   | 499 first-episode patients (blood samples) | 497 | Specific epigenetic markers for Chinese population |                                                                                                                                         |

|                                                                          |                     |                            |                                                 |      |                                                                                                                                                   |  |
|--------------------------------------------------------------------------|---------------------|----------------------------|-------------------------------------------------|------|---------------------------------------------------------------------------------------------------------------------------------------------------|--|
| miR-328, miR-17-5p, miR-134, miR-652, miR-382, and miR-107 [19]          | Microarray analysis | Australian                 | 37 (post-mortem dorsolateral prefrontal cortex) | 37   | Elevated miRNA expression in schizophrenia                                                                                                        |  |
| miR-181b-5p, miR-21-5p, miR-195-5p, miR-137, miR-346 and miR-341-5p [20] | Meta-analysis       | Chinese                    | 330 (peripheral blood mononuclear cells)        | 202  | Pooled sensitivity (0.81), specificity (0.81), diagnostic odds ratio (18), positive and negative likelihood ratio was 4.3 and 0.24. ROC was 0.87. |  |
| <b>Inflammatory markers</b>                                              |                     |                            |                                                 |      |                                                                                                                                                   |  |
| CRP [21-23]                                                              | ELISA               | Caucasian, Arabic, Indian, | 4392                                            | 3039 | Positive correlation with disease severity and cognitive function. Threshold: > 5mg/L                                                             |  |

|                        |                   |                      |                                        |                     |                                                                                                                                                                      |  |
|------------------------|-------------------|----------------------|----------------------------------------|---------------------|----------------------------------------------------------------------------------------------------------------------------------------------------------------------|--|
|                        |                   | Japanese,<br>Chinese |                                        |                     |                                                                                                                                                                      |  |
| IL-6 [24, 25, 26]      | ELISA             | Caucasian            | 164 (serum samples), 230 (CSF samples) | 164 (serum samples) | Increased in both serum and CSF samples; higher baseline IL-6 predicts prognosis; associated with kynurenine pathway; could be normalized by antipsychotic treatment |  |
| IL-8 [24, 25]          | ELISA             | Caucasian            | 119 (serum samples), 95 (CSF samples)  | 119 (serum samples) | Increased in both serum and CSF samples                                                                                                                              |  |
| KYN [27]               | Mass Spectrometry | Caucasian            | 28                                     | 30                  | Plasma level was positively correlated with IL-1 $\beta$ and PANSS                                                                                                   |  |
| TNF- $\alpha$ [28, 29] | ELISA             | Caucasian            | 171                                    | 171                 | Increased in schizophrenia, associated with kynurenine pathway; increased in acute exacerbations were not reversible following anti-psychotic treatment              |  |

|                                 |                         |                     |                      |     |                                                                                         |  |
|---------------------------------|-------------------------|---------------------|----------------------|-----|-----------------------------------------------------------------------------------------|--|
| IL-1 $\beta$ [27, 29]           | ELISA                   | Caucasian,<br>Asian | 127                  | 127 | Increased in schizophrenia, which could be normalized by antipsychotic treatment        |  |
| TGF- $\beta$ [29]               | ELISA                   | Caucasian,<br>Asian | 78                   | 262 | Increased in schizophrenia, which could be normalized by antipsychotic treatment        |  |
| IL-12 [29]                      | ELISA                   | Caucasian           | 78                   | 113 | Increased in acute exacerbations were not reversible following anti-psychotic treatment |  |
| IFN- $\gamma$ [24, 29]          | ELISA                   | Caucasian           | 57                   | 202 | Increased in acute exacerbations were not reversible following anti-psychotic treatment |  |
| sIL-2R [29]                     | ELISA                   | Caucasian           | 32                   | 94  | Increased in acute exacerbations were not reversible following anti-psychotic treatment |  |
| <b>Neurotransmitter markers</b> |                         |                     |                      |     |                                                                                         |  |
| 5-HIAA [31]                     | mass<br>fragmentography | Caucasian           | 515 (CSF<br>samples) | 68  | Negatively associated with delusions and sadness but not with suicidal attempt          |  |
| HVA [32]                        | mass<br>fragmentography | Caucasian           | 515 (CSF<br>samples) | 68  | Decreased in schizophrenia                                                              |  |

|                            |                                |                                      |                     |     |                                                                                                                                                                                                               |  |
|----------------------------|--------------------------------|--------------------------------------|---------------------|-----|---------------------------------------------------------------------------------------------------------------------------------------------------------------------------------------------------------------|--|
| Glutathione (GSH) [33, 34] | Modifications of Tietze method | American                             | 46 (plasma samples) | 50  | Decreased in schizophrenia                                                                                                                                                                                    |  |
| Norepinephrine [35]        | ELISA                          | Turkish                              | 33                  | 31  | Decreased in schizophrenia.<br>Sensitivity: 76.6%<br>Specificity: 78.8%<br>positive predictive value: 76.6%<br>negative predictive value: 76.4%<br>Threshold: 4666 (cut-off of renalase-norepinephrine ratio) |  |
| <b>Peripheral proteins</b> |                                |                                      |                     |     |                                                                                                                                                                                                               |  |
| NGF [36-38].               | ELISA                          | Chinese                              | 30                  | 0   | Decreased in schizophrenia                                                                                                                                                                                    |  |
| BDNF [39-43]               | ELISA                          | Chinese,<br>Caucasian,<br>Australian | 380                 | 144 | Decreased in schizophrenia; correlated with memory; lower in patients with depression than those without; changes continuously from preclinical to clinical stages, higher in female patients                 |  |

|                       |                                                                |                     |      |     |                                                                                                                                                                                                                                                                                                             |
|-----------------------|----------------------------------------------------------------|---------------------|------|-----|-------------------------------------------------------------------------------------------------------------------------------------------------------------------------------------------------------------------------------------------------------------------------------------------------------------|
| Hcy [44-48]           | Enzyme cycle method / latex enhanced immunoturbidimetric assay | Chinese, Caucasian  | 1219 | 231 | Prevalence of hyperhomocysteinemia in Han Chinese schizophrenia patients and healthy controls was 55.05% and 26.98%, respectively; negatively associated with cognitive performance, positively correlated with CDSS; homocysteine-related SNPs were associated with schizophrenia.<br>Threshold: >15µmol/L |
| VitB6 [49-52]         | LC-MS                                                          | Australian, Chinese | 195  | 168 | Decreased in schizophrenia                                                                                                                                                                                                                                                                                  |
| G72 [53-55]           | ELISA                                                          | Japanese, Turkish   | 134  | 87  | Increased serum level, no significant change of CSF level.<br>Sensitivity: 0.991<br>Specificity: 0.821<br>Threshold: 141.51pg/mL                                                                                                                                                                            |
| <b>Gut Microbiota</b> |                                                                |                     |      |     |                                                                                                                                                                                                                                                                                                             |

|                                                           |                            |                                                                 |                                                   |    |                                                                                                                                                                          |                          |
|-----------------------------------------------------------|----------------------------|-----------------------------------------------------------------|---------------------------------------------------|----|--------------------------------------------------------------------------------------------------------------------------------------------------------------------------|--------------------------|
| <i>Ruminococcaceae</i><br>[56]                            | 16S rRNA<br>sequencing     | American                                                        | 25                                                | 25 | negatively correlated with severity of negative symptoms                                                                                                                 |                          |
| <i>Bacteroides</i><br>[56]                                | 16S rRNA<br>sequencing     | American                                                        | 25                                                | 25 | positively correlated with depressive symptoms                                                                                                                           |                          |
| IgA level in<br>response to<br><i>Pseudomonas</i><br>[57] | ELISA                      | Thailand                                                        | 80                                                | 38 | elevated IgA level in response to <i>Pseudomonas</i> ,<br>elevated IgM level in response to Gram negative<br>bacteria are highly predictive for deficit<br>schizophrenia | Deficit<br>schizophrenia |
| <i>Candida</i> [58]                                       | ELISA                      | American                                                        | 440                                               | 0  | increased seropositivity, correlated with positive<br>psychiatric symptoms                                                                                               |                          |
| <b>Pharmacogenomic markers</b>                            |                            |                                                                 |                                                   |    |                                                                                                                                                                          |                          |
| CYP2D6 &<br>CYP2C19<br>polymorphism<br>[59]               | Genotyping /<br>Sequencing | African,<br>African<br>American,<br>Caucasian,<br>Near Eastern, | For Chinese<br>population:<br>CYP2D6<br>(n=5795); | 0  | Test when making individualized therapeutic<br>strategies.<br>Frequencies of poor metabolizer of CYP2D6 and<br>CYP2C19 is 0.9% and 13% in East Asian<br>population       |                          |

|                                     |  |                                           |                                                   |   |                                                                                                                                                                                  |  |
|-------------------------------------|--|-------------------------------------------|---------------------------------------------------|---|----------------------------------------------------------------------------------------------------------------------------------------------------------------------------------|--|
|                                     |  | East Asian,<br>South/Central              | CYP2C19<br>(n=13475)                              |   |                                                                                                                                                                                  |  |
| HLA-A & HLA-B polymorphism<br>[59]  |  | Asian,<br>Americas,<br>Latino,<br>Oceania | For Chinese<br>population:<br>n=39048             | 0 | Test when carbamazepine is administered.<br>Frequencies of poor metabolizer of HLA-A and HLA-B is 3.5% and 4.6% in East Asian population.<br>Threshold: HLA-A*31:01; HLA-B*15:02 |  |
| HLA-B polymorphism<br>[59]          |  |                                           | For Chinese<br>population:<br>n=39048             | 0 | Test when oxcarbazepine is provided.<br>Frequency of poor metabolizer is 4.6% in East Asian population.<br>Threshold: HLA-B*15:02                                                |  |
| CYP2C9 & HLA-B polymorphism<br>[59] |  |                                           | For Chinese<br>population:<br>CYP2C9<br>(n=14167) | 0 | Test when phenytoin is administered.<br>Frequencies of poor metabolizer of CYP2C9 is 0.6% in East Asian population                                                               |  |

|                                                                   |                |           |                                                                                 |   |                                                                                                        |                                         |
|-------------------------------------------------------------------|----------------|-----------|---------------------------------------------------------------------------------|---|--------------------------------------------------------------------------------------------------------|-----------------------------------------|
| Dopamine transporter gene [60]                                    | DNA sequencing | Chinese   | 160 patients treated with clozapine only, 160 treated with chlorpromazine only. | 0 | Test polymorphism of dopamine transporter gene (rs2975226) when using clozapine.                       | Clozapine responders and non-responders |
| Serotonergic receptor type 2A, T102C, type 2C and type 6 [61, 62] | DNA sequencing | Caucasian | 200 patients treated with clozapine                                             | 0 | Test polymorphism when using clozapine.<br>Sensitivity: 95%<br>prediction of clozapine response: 76.7% | Clozapine responders and non-responders |
| HTR2C [63]                                                        | Taqman Assay   | American  | 171                                                                             | 0 | Test polymorphism when using HTR2C antagonists                                                         | Responders and non-responders           |

N/A: not applicable; UNK: unknown

**Supplementary Table 1: Evidence linking genetics, inflammation, neurotransmitter, peripheral protein, gut microbiota and pharmacogenetics to schizophrenia.**

Abbreviations: CNV: copy number variants; SNP: single-nucleotide polymorphism; GWAS: genome-wide association study; MHC: major histocompatibility complex; ZNF804A: zinc-finger protein 804A; NRG1: neurogranin; TCF4: transcription factor 4; HNF4G: hepatocyte nuclear factor 4γ; HDAC9: NADH dehydrogenase [ubiquinone] iron-sulfur protein 4; HDAC9: histone deacetylase 9; ANK3: ankyrin-3; NRG1: neuregulin 1; DTNBP1: dystrobrevin-binding protein 1; 5-HT2A: serotonin receptor 2A; DβH: dopamine β-hydroxylase; DGKH: diacylglycerol kinase eta; COMT: catechol-O-methyltransferase; RELN: reelin; GAD1: glutamic acid decarboxylase; HTR1A: serotonin receptor type-1; THAP1: THAP domain-containing protein 1; KCNQ4: potassium voltage-gated channel subfamily KQT member 4; CRP: C-reactive protein; GM-CSF: granulocyte macrophage colony-stimulating factor; MCP-1: monocyte chemoattractant protein 1; PDGF-B: platelet-derived growth factor subunit B; MIP: monocyte inflammatory protein; VEGF-A: vascular endothelial growth factor A; RANTES: regulated on activation, normal T cell expressed and secreted; TGF-β: transforming growth factor-β; TNF-α: tumor necrosis factor-α; GABA<sub>A</sub>Rα1: gamma-aminobutyric acid A receptor; DPYD: dihydropyrimidine dehydrogenase; MAD1L1: mitotic arrest deficient-like 1; DRD2: dopamine receptor D2; TRANK1: tetratricopeptide repeat and ankyrin repeat containing 1; MMP16: matrix metalloproteinase-16; HVA: homovanillic acid; NGF: Nerve Growth Factor; BDNF: Brain Derived Neurotrophic Factor; Hcy: homocysteine; CDSS: Calgary Depression Scale for Schizophrenia; HLA: human leukocyte antigen

### Supplementary Table 1 References

1. Murphy KC. Schizophrenia and velo-cardio-facial syndrome. *Lancet*. 2002; 359(9304): 426-30.
2. Sporn A, Addington A, Reiss AL, et al. 22q11 deletion syndrome in childhood onset schizophrenia: an update. *Mol Psychiatry*. 2004; 9(3):

- 225-6.
3. Marshall CR, Howrigan DP, Merico D, et al. Contribution of copy number variants to schizophrenia from a genome-wide study of 41,321 subjects. *Nature Genetics*. 2017; 49(1): 27-35.
  4. Lowther C, Costain G, Baribeau DA, et al. Genomic Disorders in Psychiatry-What Does the Clinician Need to Know? *Curr Psychiatry Rep*. 2017; 19(11): 82.
  5. Nakahara S, Medland S, Turner JA, et al. Polygenic risk score, genome-wide association, and gene set analyses of cognitive domain deficits in schizophrenia. *Schizophrenia Research*. 2018; 201: 393-399.
  6. Li Z, Chen J, Yu H, et al. Genome-wide association analysis identifies 30 new susceptibility loci for schizophrenia. *Nat Genet*. 2017; 49(11): 1576-1583.
  7. Gurung R and Prata DP. What is the impact of genome-wide supported risk variants for schizophrenia and bipolar disorder on brain structure and function? A systematic review. *Psychol Med*. 2015; 45(12): 2461-80.
  8. Cho Y, Ryu S, Huh I, et al. Effects of genetic variations in NRG1 on cognitive domains in patients with schizophrenia and healthy individuals. *Psychiatr Genet*. 2015; 25(4): 147-54.
  9. Matosin N, Newell KA, Quide Y, et al. Effects of common GRM5 genetic variants on cognition, hippocampal volume and mGluR5 protein levels in schizophrenia. *Brain Imaging Behav*. 2018; 12(2): 509-517.
  10. Baek JH, Kim JS, Ryu S, et al. Association of genetic variations in DTNBP1 with cognitive function in schizophrenia patients and healthy subjects. *Am J Med Genet B Neuropsychiatr Genet*. 2012; 159B(7): 841-9.
  11. Varela-Gomez N, Mata I, Perez-Iglesias R, et al. Dysbindin gene variability is associated with cognitive abnormalities in first-episode non-affective psychosis. *Cogn Neuropsychiatry*. 2015; 20(2): 144-56.
  12. Vyas NS, Lee Y, Ahn K, et al. Association of a Serotonin Receptor 2A Gene Polymorphism with Visual Sustained Attention in Early-Onset Schizophrenia Patients and their Non-Psychotic Siblings. *Aging Dis*. 2012; 3(4): 291-300.
  13. Sun Z, Ma Y, Li W, et al. Associations between the DBH gene, plasma dopamine beta-hydroxylase activity and cognitive measures in Han Chinese patients with schizophrenia. *Schizophr Res*. 2018; 193: 58-63.
  14. Yates D. Synaptic plasticity: Micro-level disruption. *Nat Rev Neurosci*. 2015; 16(7): 373.
  15. Kim AH, Parker EK, Williamson V, et al. Experimental validation of candidate schizophrenia gene ZNF804A as target for hsa-miR-137.

- Schizophr Res. 2012; 141(1): 60-64.
16. Kwon E, Wang W, and Tsai LH. Validation of schizophrenia-associated genes CSMD1, C10orf26, CACNA1C and TCF4 as miR-137 targets. *Mol Psychiatry*. 2013; 18(1): 11-2.
  17. Abdolmaleky HM, Cheng KH, Russo A, et al. Hypermethylation of the reelin (RELN) promoter in the brain of schizophrenic patients: a preliminary report. *Am J Med Genet B Neuropsychiatr Genet*. 2005; 134B(1): 60-6.
  18. Li M, Li Y, Qin H, et al. Genome-wide DNA methylation analysis of peripheral blood cells derived from patients with first-episode schizophrenia in the Chinese Han population. *Mol Psychiatry*. 2020.
  19. Santarelli DM, Beveridge NJ, Tooney PA, et al. Upregulation of dicer and microRNA expression in the dorsolateral prefrontal cortex Brodmann area 46 in schizophrenia. *Biol Psychiatry*. 2011; 69(2): 180-7.
  20. Liu S, Zhang F, Wang X, et al. Diagnostic value of blood-derived microRNAs for schizophrenia: results of a meta-analysis and validation. *Sci Rep*. 2017; 7(1): 15328.
  21. Orsolini L, Sarchione F, Vellante F, et al. Protein-C Reactive as Biomarker Predictor of Schizophrenia Phases of Illness? A Systematic Review. *Curr Neuropharmacol*. 2018; 16(5): 583-606.
  22. Sanada K, Montero-Marin J, Barcelo-Soler A, et al. Effects of Mindfulness-Based Interventions on Biomarkers and Low-Grade Inflammation in Patients with Psychiatric Disorders: A Meta-Analytic Review. *Int J Mol Sci*. 2020; 21(7).
  23. Bora E. Peripheral inflammatory and neurotrophic biomarkers of cognitive impairment in schizophrenia: a meta-analysis. *Psychol Med*. 2019; 49(12): 1971-1979.
  24. Frydecka D, Krzystek-Korpacka M, Lubeiro A, et al. Profiling inflammatory signatures of schizophrenia: A cross-sectional and meta-analysis study. *Brain Behav Immun*. 2018; 71: 28-36.
  25. Orlovska-Waast S, Kohler-Forsberg O, Brix SW, et al. Cerebrospinal fluid markers of inflammation and infections in schizophrenia and affective disorders: a systematic review and meta-analysis. *Mol Psychiatry*. 2019; 24(6): 869-887.
  26. Feng T, McEvoy JP, and Miller BJ. Longitudinal study of inflammatory markers and psychopathology in schizophrenia. *Schizophr Res*. 2020; 224: 58-66.
  27. Joaquim HPG, Costa AC, Gattaz WF, et al. Kynurenine is correlated with IL-1beta in plasma of schizophrenia patients. *J Neural Transm (Vienna)*. 2018; 125(5): 869-873.

28. Pedraz-Petrozzi B, Elyamany O, Rummel C, et al. Effects of inflammation on the kynurenine pathway in schizophrenia - a systematic review. *J Neuroinflammation*. 2020; 17(1): 56.
29. Miller BJ, Buckley P, Seabolt W, et al. Meta-analysis of cytokine alterations in schizophrenia: clinical status and antipsychotic effects. *Biol Psychiatry*. 2011; 70(7): 663-71.
30. Rasmussen H, Frokjaer VG, Hilker RW, et al. Low frontal serotonin 2A receptor binding is a state marker for schizophrenia? *Eur Neuropsychopharmacol*. 2016; 26(7): 1248-50.
31. Carlborg A, Jokinen J, Nordstrom AL, et al. CSF 5-HIAA, attempted suicide and suicide risk in schizophrenia spectrum psychosis. *Schizophr Res*. 2009; 112(1-3): 80-5.
32. Wieselgren IM and Lindstrom LH. CSF levels of HVA and 5-HIAA in drug-free schizophrenic patients and healthy controls: a prospective study focused on their predictive value for outcome in schizophrenia. *Psychiatry Res*. 1998; 81(2): 101-10.
33. Kumar J, Liddle EB, Fernandes CC, et al. Glutathione and glutamate in schizophrenia: a 7T MRS study. *Mol Psychiatry*. 2020; 25(4): 873-882.
34. Coughlin JM, Yang K, Marsman A, et al. A multimodal approach to studying the relationship between peripheral glutathione, brain glutamate, and cognition in health and in schizophrenia. *Mol Psychiatry*. 2020.
35. Catak Z, Kocdemir E, Ugur K, et al. A Novel Biomarker Renalase and Its Relationship with its Substrates in Schizophrenia. *J Med Biochem*. 2019; 38(3): 299-305.
36. Qin XY, Wu HT, Cao C, et al. A meta-analysis of peripheral blood nerve growth factor levels in patients with schizophrenia. *Mol Psychiatry*. 2017; 22(9): 1306-1312.
37. Rao S, Martinez-Cengotitabengoa M, Yao Y, et al. Peripheral blood nerve growth factor levels in major psychiatric disorders. *J Psychiatr Res*. 2017; 86: 39-45.
38. Chu CS, Chu CL, Wu CC, et al. Serum nerve growth factor beta, brain- and glial-derived neurotrophic factor levels and psychopathology in unmedicated patients with schizophrenia. *J Chin Med Assoc*. 2018; 81(6): 577-581.
39. Cakici N, Sutterland AL, Penninx B, et al. Altered peripheral blood compounds in drug-naive first-episode patients with either schizophrenia or major depressive disorder: a meta-analysis. *Brain Behav Immun*. 2020; 88: 547-558.
40. Yang Y, Liu Y, Wang G, et al. Brain-derived neurotrophic factor is associated with cognitive impairments in first-episode and chronic

- schizophrenia. *Psychiatry Res.* 2019; 273: 528-536.
41. Fang X, Chen Y, Wang Y, et al. Depressive symptoms in schizophrenia patients: A possible relationship between SIRT1 and BDNF. *Prog Neuropsychopharmacol Biol Psychiatry.* 2019; 95: 109673.
  42. Heitz U, Pappmeyer M, Studerus E, et al. Plasma and serum brain-derived neurotrophic factor (BDNF) levels and their association with neurocognition in at-risk mental state, first episode psychosis and chronic schizophrenia patients. *World J Biol Psychiatry.* 2019; 20(7): 545-554.
  43. Weickert CS, Lee CH, Lenroot RK, et al. Increased plasma Brain-Derived Neurotrophic Factor (BDNF) levels in females with schizophrenia. *Schizophr Res.* 2019; 209: 212-217.
  44. Yang Y, Wang J, Xiong Z, et al. Prevalence and clinical demography of hyperhomocysteinemia in Han Chinese patients with schizophrenia. *Eur Arch Psychiatry Clin Neurosci.* 2020.
  45. Trzesniowska-Drukala B, Kalinowska S, Safranow K, et al. Evaluation of hyperhomocysteinemia prevalence and its influence on the selected cognitive functions in patients with schizophrenia. *Prog Neuropsychopharmacol Biol Psychiatry.* 2019; 95: 109679.
  46. Liu Y, Tao H, Yang X, et al. Decreased Serum Oxytocin and Increased Homocysteine in First-Episode Schizophrenia Patients. *Front Psychiatry.* 2019; 10: 217.
  47. Zhang Y, Zhao J, Wang W, et al. Homocysteine, but not MTHFR gene polymorphism, influences depressive symptoms in patients with schizophrenia. *J Affect Disord.* 2020; 272: 24-27.
  48. Kinoshita M, Numata S, Tajima A, et al. Cumulative effect of the plasma total homocysteine-related genetic variants on schizophrenia risk. *Psychiatry Res.* 2016; 246: 833-837.
  49. Fryar-Williams S and Strobel JE. Biomarkers of a five-domain translational substrate for schizophrenia and schizoaffective psychosis. *Biomark Res.* 2015; 3: 3.
  50. Cao B, Sun XY, Zhang CB, et al. Association between B vitamins and schizophrenia: A population-based case-control study. *Psychiatry Res.* 2018; 259: 501-505.
  51. Tomioka Y, Numata S, Kinoshita M, et al. Decreased serum pyridoxal levels in schizophrenia: meta-analysis and Mendelian randomization analysis. *J Psychiatry Neurosci.* 2018; 43(3): 194-200.
  52. Yazici AB, Akcay Ciner O, Yazici E, et al. Comparison of vitamin B12, vitamin D and folic acid blood levels in patients with schizophrenia,

- drug addiction and controls. *J Clin Neurosci*. 2019; 65: 11-16.
53. Ishiwata S, Hattori K, Sasayama D, et al. Plasma and cerebrospinal fluid G72 protein levels in schizophrenia and major depressive disorder. *Psychiatry Res*. 2017; 254: 244-250.
  54. Lin E, Lin CH, Lai YL, et al. Combination of G72 Genetic Variation and G72 Protein Level to Detect Schizophrenia: Machine Learning Approaches. *Front Psychiatry*. 2018; 9: 566.
  55. Akyol ES, Albayrak Y, Aksoy N, et al. Increased serum G72 protein levels in patients with schizophrenia: a potential candidate biomarker. *Acta Neuropsychiatr*. 2017; 29(2): 80-86.
  56. Nguyen TT, Kosciolk T, Maldonado Y, et al. Differences in gut microbiome composition between persons with chronic schizophrenia and healthy comparison subjects. *Schizophr Res*. 2019; 204: 23-29.
  57. Maes M, Kanchanatawan B, Sirivichayakul S, et al. In Schizophrenia, Increased Plasma IgM/IgA Responses to Gut Commensal Bacteria Are Associated with Negative Symptoms, Neurocognitive Impairments, and the Deficit Phenotype. *Neurotox Res*. 2019; 35(3): 684-698.
  58. Severance EG, Gressitt KL, Stallings CR, et al. Probiotic normalization of *Candida albicans* in schizophrenia: A randomized, placebo-controlled, longitudinal pilot study. *Brain Behav Immun*. 2017; 62: 41-45.
  59. Bousman CA, Bengesser SA, Aitchison KJ, et al. Review and Consensus on Pharmacogenomic Testing in Psychiatry. *Pharmacopsychiatry*. 2021; 54(1): 5-17.
  60. Xu M, Xing Q, Li S, et al. Pharmacogenetic effects of dopamine transporter gene polymorphisms on response to chlorpromazine and clozapine and on extrapyramidal syndrome in schizophrenia. *Prog Neuropsychopharmacol Biol Psychiatry*. 2010; 34(6): 1026-32.
  61. Arranz M, Collier D, Sodhi M, et al. Association between clozapine response and allelic variation in 5-HT<sub>2A</sub> receptor gene. *Lancet*. 1995; 346(8970): 281-2.
  62. Arranz MJ, Munro J, Birkett J, et al. Pharmacogenetic prediction of clozapine response. *Lancet*. 2000; 355(9215): 1615-6.
  63. Li J, Hashimoto H, and Meltzer HY. Association of Serotonin<sub>2c</sub> Receptor Polymorphisms With Antipsychotic Drug Response in Schizophrenia. *Front Psychiatry*. 2019; 10: 58.
